# Supplementary material
Source: publisher figshare collection journal article supplement (https://tandf.figshare.com/ndownloader/files/17889641)
Supplement: Supplementary file 1 [file 17889641]

**Supplementary table 1.** Events per cycle according to recorded type of G-CSF administration. Delay presented as pooled data from the both standard and experimental group and dose reductions only for the standard chemotherapy group.

|  |  | **With G-CSF** | | **Without G-CSF** | | **Unknown** | **Total** | **Odds Ratio** |
| --- | --- | --- | --- | --- | --- | --- | --- | --- |
|  |  | Total Cycles | % | Total Cycles | % |  |  |  |
|  |  | 10391 | 100.00 | 2950 | 100.00 | 93 | 13434 |  |
|  |  |  |  |  |  |  |  |  |
| **Causes for delay of next chemotherapy cycle** | | | | | | | |  |
|  | Febrile neutropenia | 10 | 0.10% | 5 | 0.17% | 1 | 16 | OR 0.57  95% C.I. 0.18 – 2.21 |
|  | Infection with normal ANC | 101 | 0.97% | 11 | 0.37% | 0 | 112 | OR 2.62*  95% C.I. 1.40 – 5.43 |
|  | Infection with neutropenia | 14 | 0.13% | 5 | 0.17% | 0 | 19 | OR 0.79  95% C.I. 0.27 – 2.82 |
|  | Leukopenia | 27 | 0.26% | 24 | 0.81% | 0 | 51 | OR 0.32*  95% C.I. 0.18 – 0-58 |
|  | Neutropenia | 28 | 0.27% | 79 | 2.68% | 6 | 113 | OR 0.098*  95% C.I. 0.06 – 0.15 |
|  | Other | 359 | 3.45% | 76 | 2.58% | 4 | 439 |  |
|  |  |  |  |  |  |  |  |  |
| **Causes for dose reduction**  (reported only for standard chemotherapy arm) | | | | | | | |  |
|  |  | 2 472 |  | 2 336 |  | 70 | 4 878 |  |
|  | Febrile neutropenia | 3 | 0,12% | 1 | 0,04% | 0 | 4 |  |
|  | Infection with normal ANC | 6 | 0,24% | 2 | 0,09% | 0 | 8 |  |
|  | Leukopenia | 2 | 0,08% | 2 | 0,09% | 0 | 4 |  |
|  | Neutropenia | 13 | 0,53% | 3 | 0,13% | 1 | 17 |  |
|  | Other | 93 | 3,76% | 33 | 1,41% | 2 | 128 |  |
|  |  |  |  |  |  |  |  |  |
|  |  |  |  |  |  |  |  |  |

*Fisher’s exact test, p<0.01

ANC: absolute neutrophil count, C.I.: Confidence Interval, G-CSF: granulocyte-colony stimulating factor, OR: Odds Ratio

**Supplementary table 2.** Treatment delays per cycle before and after change of policy, cut off date 1st August 2010

|  | Before policy change | After policy change |
| --- | --- | --- |
|  | N =9252  (%) | N= 4088  (%) |
| Reason for delay |  |  |
| Febrile neutropenia | 10 (0.11) | 3 (0.07) |
| Infection with normal ANC | 69 (0.75) | 43 (1.1) |
| Infection with neutropenia | 19 (0.21) | 0 |
| Leukopenia | 33 (0.36) | 18 (0.44) |
| Neutropenia | 87 (0.9) | 20 (0.49) |
